# Supplementary material
Source: PubMed Central journal article supplement (PMC2040889)

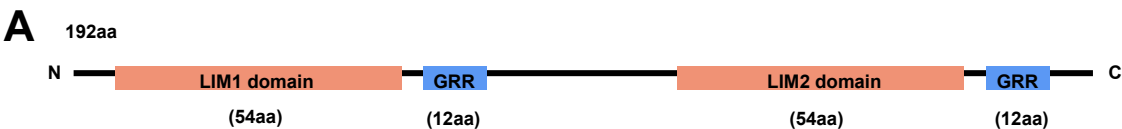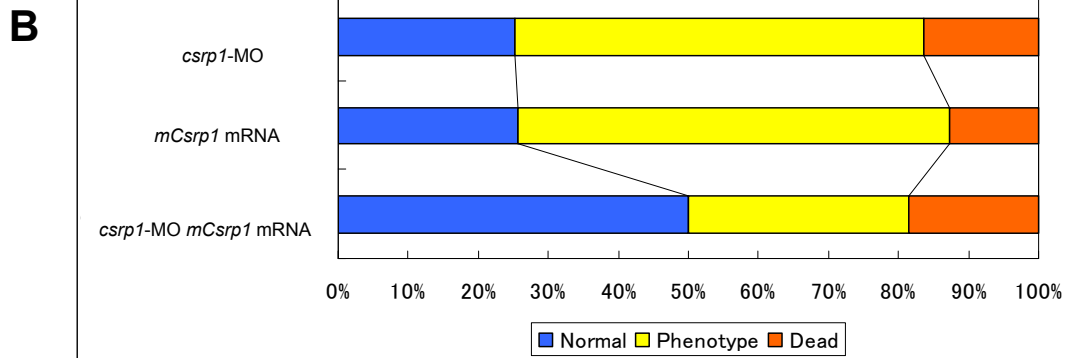

**C**

|                                      | Normal | Phenotype | Dead  |       |
|--------------------------------------|--------|-----------|-------|-------|
| <i>csrp1</i> MO                      | 25.2%  | 58.5%     | 16.3% | n=163 |
| <i>mCsrp1</i> mRNA                   | 25.7%  | 61.5%     | 12.8% | n=137 |
| <i>csrp1</i> MO + <i>mCsrp1</i> mRNA | 50.0%  | 31.5%     | 18.5% | n=185 |

Supplement: pnas_0702000104_1.pdf [file pnas_0702000104_1.pdf]

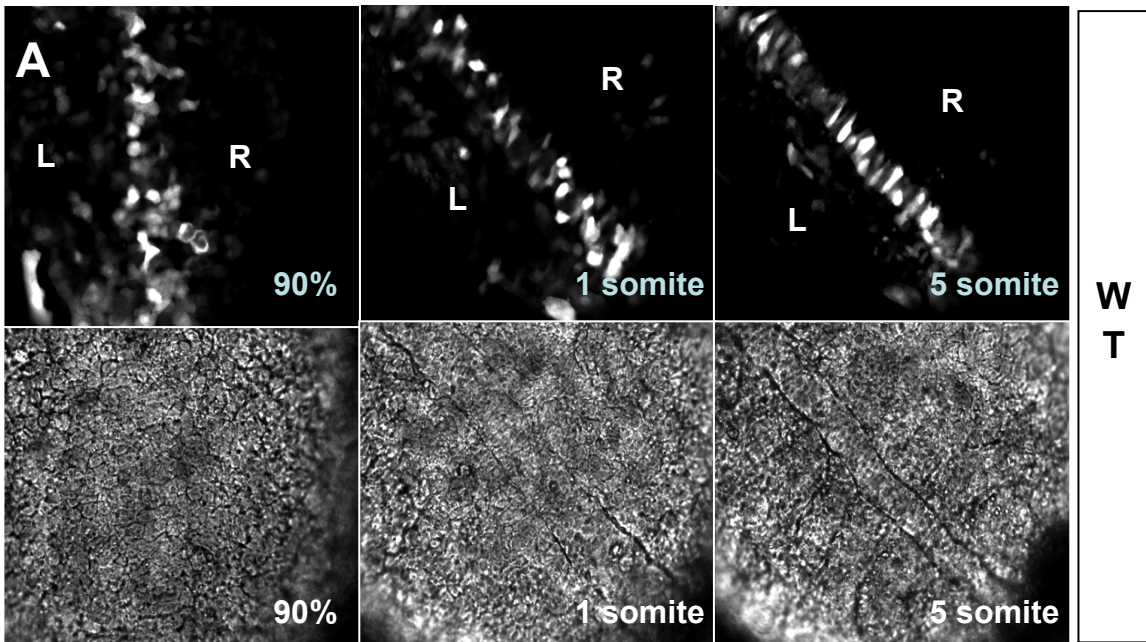

Supplement: pnas_0702000104_2.pdf [file pnas_0702000104_2.pdf]

**10-13 somite**

**A**

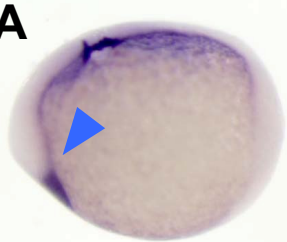

**lateral view**

**wnt11-MO**

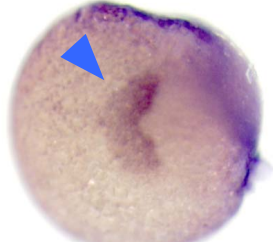

**head view**

**10-13 somite**

**B**

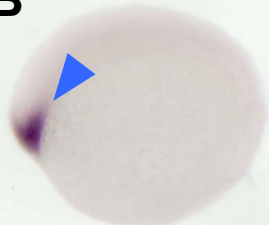

**lateral view**

**wnt5-MO**

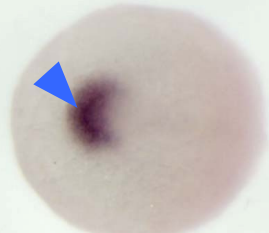

**head view**

Supplement: pnas_0702000104_3.pdf [file pnas_0702000104_3.pdf]

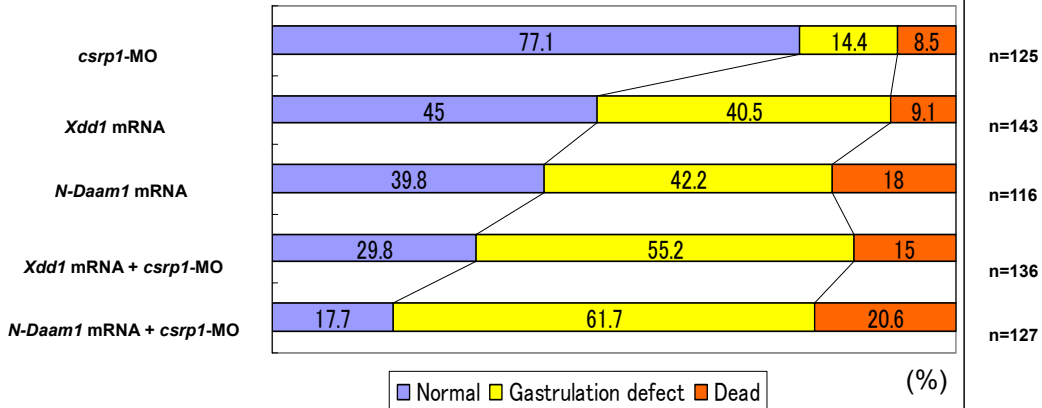

Supplement: pnas_0702000104_4.pdf [file pnas_0702000104_4.pdf]

**A**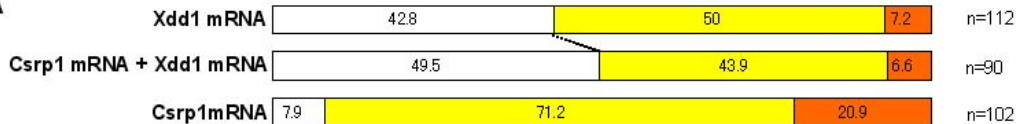**B**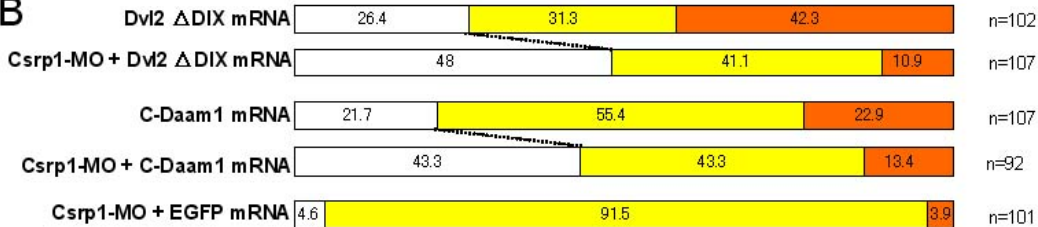

Normal  
  Gastrulation defect  
  Dead   (%)

48hpf

Supplement: pnas_0702000104_5.pdf [file pnas_0702000104_5.pdf]

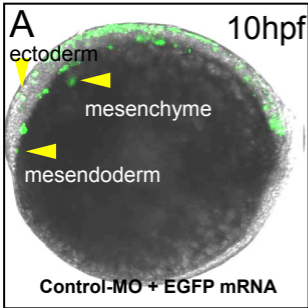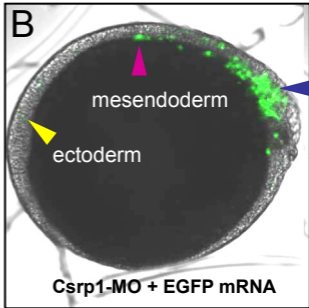

Supplement: pnas_0702000104_6.pdf [file pnas_0702000104_6.pdf]
